# Supplementary material
Source: publisher figshare collection journal article supplement (https://sage.figshare.com/ndownloader/files/13314398)
Supplement: Supplementary file 1 [file 13314398]

### Supplementary table 1: MOOSE checklist

See separate supplementary table

#### Moose checklist

| Recommendation                                                                                                                             | Reported on page no |
|--------------------------------------------------------------------------------------------------------------------------------------------|---------------------|
| <b>Reporting of background should include</b>                                                                                              |                     |
| Problem definition                                                                                                                         | 3,4                 |
| Hypothesis statement                                                                                                                       | 3,4                 |
| Description of study outcome(s)                                                                                                            | 4                   |
| Type of exposure or intervention used                                                                                                      | 4                   |
| Type of study designs used                                                                                                                 | 4,5                 |
| Study population                                                                                                                           | 4,5                 |
| <b>Reporting of search strategy should include</b>                                                                                         |                     |
| Qualifications of searchers (eg, librarians and investigators)                                                                             | 26                  |
| Search strategy, including time period included in the synthesis and keywords                                                              | 4,5                 |
| Effort to include all available studies, including contact with authors                                                                    | 5                   |
| Databases and registries searched                                                                                                          | 4,5                 |
| Search software used, name and version, including special features used (eg, explosion)                                                    | NA                  |
| Use of hand searching (eg, reference lists of obtained articles)                                                                           | 5                   |
| List of citations located and those excluded, including justification                                                                      | Flow diagram        |
| Method of addressing articles published in languages other than English                                                                    | NA                  |
| Method of handling abstracts and unpublished studies                                                                                       | 5                   |
| Description of any contact with authors                                                                                                    | 5,8                 |
| <b>Reporting of methods should include</b>                                                                                                 |                     |
| Description of relevance or appropriateness of studies assembled for assessing the hypothesis to be tested                                 | 5,6                 |
| Rationale for the selection and coding of data (eg, sound clinical principles or convenience)                                              | NA                  |
| Documentation of how data were classified and coded (eg, multiple raters, blinding, and interrater reliability)                            | 6                   |
| Assessment of confounding (eg, comparability of cases and controls in studies where appropriate)                                           | 6                   |
| Assessment of study quality, including blinding of quality assessors; stratification or regression on possible predictors of study results | 6                   |

|                                                                                                                                                                                                                                                                              |                                                  |
|------------------------------------------------------------------------------------------------------------------------------------------------------------------------------------------------------------------------------------------------------------------------------|--------------------------------------------------|
| Assessment of heterogeneity                                                                                                                                                                                                                                                  | 7                                                |
| Description of statistical methods (eg, complete description of fixed or random effects models, justification of whether the chosen models account for predictors of study results, dose-response models, or cumulative meta-analysis) in sufficient detail to be replicated | 6,7                                              |
| Provision of appropriate tables and graphics                                                                                                                                                                                                                                 | 8-15                                             |
| <b>Reporting of results should include</b>                                                                                                                                                                                                                                   |                                                  |
| Graphic summarizing individual study estimates and overall estimate                                                                                                                                                                                                          | 8-15                                             |
| Table giving descriptive information for each study included                                                                                                                                                                                                                 | Table 1                                          |
| Results of sensitivity testing (eg, subgroup analysis)                                                                                                                                                                                                                       | 15; supplementary table 5                        |
| Indication of statistical uncertainty of findings                                                                                                                                                                                                                            | Yes, presented as CIs in all results and figures |
| <b>Reporting of discussion should include</b>                                                                                                                                                                                                                                |                                                  |
| Quantitative assessment of bias (eg, publication bias)                                                                                                                                                                                                                       | 14                                               |
| Justification for exclusion (eg, exclusion of non-English-language citations)                                                                                                                                                                                                | NA                                               |
| Assessment of quality of included studies                                                                                                                                                                                                                                    | 17,18                                            |
| <b>Reporting of conclusions should include</b>                                                                                                                                                                                                                               |                                                  |
| Consideration of alternative explanations for observed results                                                                                                                                                                                                               | 19,20                                            |
| Generalization of the conclusions (ie, appropriate for the data presented and within the domain of the literature review)                                                                                                                                                    | 23-25                                            |
| Guidelines for future research                                                                                                                                                                                                                                               | 25                                               |
| Disclosure of funding source                                                                                                                                                                                                                                                 | 25                                               |

From: Stroup DF, Berlin JA, Morton SC, et al. (2000) Meta-analysis of observational studies in epidemiology: a proposal for reporting. Meta-analysis Of Observational Studies in Epidemiology (MOOSE) group. JAMA 283: 2008-2012.

**Supplementary table 2: Risk of pneumonia with individual antipsychotic drugs compared to no exposure**

| Antipsychotic  | No of studies | RR (95% Confidence Intervals) | Weight (%) | I <sup>2</sup> (%) |
|----------------|---------------|-------------------------------|------------|--------------------|
| Amisulpride    | 1             | 1.14 (0.79 to 1.65)           | 5.6        | NA                 |
| Chlorpromazine | 1             | 1.10 (0.68 to 1.78)           | 4.8        | NA                 |
| Clozapine      | 2             | 3.12 (2.59 to 3.74)           | 11         | 0                  |
| Haloperidol    | 2             | 2.75 (1.48 to 5.12)           | 10.7       | 78                 |
| Olanzapine     | 3             | 2.16 (1.51 to 3.09)           | 13.5       | 45.1               |
| Pipamperone    | 1             | 1.55 (0.99 to 2.42)           | 5.07       | NA                 |
| Quetiapine     | 2             | 1.79 (1.40 to 2.29)           | 12.3       | 33.2               |
| Risperidone    | 3             | 1.86 (1.17 to 2.96)           | 16.6       | 81.3               |
| Sulpiride      | 1             | 1.29 (0.94 to 1.77)           | 6          | NA                 |
| Zotepine       | 2             | 1.50 (1.20 to 1.90)           | 11.5       | 0                  |
| Zuclopenthixol | 1             | 2.25 (1.00 to 5.07)           | 2.9        | NA                 |
| Overall        | 3             | 1.88 (1.57 to 2.25)           | 100        | 81.2               |

**Supplementary information table 3: Consensus Newcastle-Ottawa Scale (NOS) Case controlled studies**

|                         |                 | Selection          |                       |                        | Comparability     |                   | Exposure      |        |                   |       |
|-------------------------|-----------------|--------------------|-----------------------|------------------------|-------------------|-------------------|---------------|--------|-------------------|-------|
| Case controlled studies | Case definition | Representativeness | Selection of controls | Definition of controls | Comparability (a) | Comparability (b) | Ascertainment | Method | Non-response rate | Total |
| Kuo et al (2013)        | 0               | 1                  | 1                     | 0                      | 1                 | 1                 | 0             | 1      | 1                 | 6     |
| Yang et al (2013)       | 0               | 1                  | 1                     | 0                      | 1                 | 1                 | 0             | 1      | 1                 | 6     |
| Gau et al (2010)        | 1               | 1                  | 1                     | 1                      | 1                 | 1                 | 0             | 1      | 1                 | 8     |
| Trifiro et al (2010)    | 1               | 1                  | 1                     | 1                      | 1                 | 1                 | 0             | 1      | 1                 | 8     |
| Knol et al (2008)       | 0               | 1                  | 1                     | 1                      | 1                 | 1                 | 0             | 1      | 1                 | 7     |
| Wada et al (2001)       | 1               | 1                  | 0                     | 0                      | 1                 | 0                 | 0             | 0      | 0                 | 3     |
| Liao et al 2013         | 0               | 1                  | 1                     | 1                      | 1                 | 1                 | 0             | 1      | 1                 | 7     |
| Barnett et al (2006)    | 0               | 1                  | 1                     | 1                      | 1                 | 1                 | 0             | 1      | 1                 | 7     |
| Pratt et al (2011))     | 0               | 1                  | 1                     | 1                      | 1                 | 1                 | 0             | 1      | 1                 | 7     |

### Definitions of cases and controls

#### Is the case definition adequate?

- a) yes, with independent validation (i.e. using more than 1 database to verify cases)
- b) yes, e.g. record linkage or based on self-reports
- c) no description

#### Comparability of cases and controls on the basis of the design or analysis

- a) study controls for 'Age' (selected by authors as the most important factor)
- b) study controls for any additional factor: Smoking, gender, chronic respiratory diseases (asthma and/or COPD), or psychiatric diagnosis. Two points if propensity score matching or adjustment for multiple variables. Chalon & Elixhauser comorbidity indices were used by some studies and covered some comorbidities.

**Supplementary information table 4: Consensus Newcastle-Ottawa Scale (NOS) for Cohort studies**

|                          | Selection          |                        |                           |                              | Comparability     |                   | Outcome    |                     |                       |       |
|--------------------------|--------------------|------------------------|---------------------------|------------------------------|-------------------|-------------------|------------|---------------------|-----------------------|-------|
| Cohort studies           | Representativeness | Selection of unexposed | Ascertainment of exposure | Outcome not present at start | Comparability (a) | Comparability (b) | Assessment | Length of follow-up | Adequacy of follow-up | Total |
| Aparasu et al (2013)     | 1                  | 1                      | 0                         | 0                            | 1                 | 1                 | 1          | 1                   | 0                     | 6     |
| Huybrechts et al (2012)  | 1                  | 1                      | 0                         | 0                            | 1                 | 1                 | 1          | 1                   | 1                     | 7     |
| Wang et al (2007)        | 1                  | 1                      | 0                         | 0                            | 1                 | 1                 | 1          | 1                   | 0                     | 6     |
| Huybrechts et al (2011)  | 1                  | 1                      | 0                         | 0                            | 1                 | 1                 | 1          | 1                   | 0                     | 6     |
| Dharmarajan et al (2011) | NA                 | NA                     | NA                        | NA                           | NA                | NA                | NA         | NA                  | NA                    | NA    |
| Star et al (2010)        | NA                 | NA                     | NA                        | NA                           | NA                | NA                | NA         | NA                  | NA                    | NA    |
| Jackson et al (2015)     | 1                  | 1                      | 0                         | 0                            | 1                 | 1                 | 1          | 1                   | 0                     | 6     |

## Supplementary information table 5: Sensitivity analyses

### A: Sensitivity analysis on variations of the primary analysis

| Comparison                                                 | No of studies  | RR   | 95% Confidence Interval | I <sup>2</sup> (%) |
|------------------------------------------------------------|----------------|------|-------------------------|--------------------|
| <i>DerSimonian &amp; Laird CIs in studies of pneumonia</i> |                |      |                         |                    |
| SGA vs no SGA                                              | 6              | 1.93 | 1.65 to 2.26            | 44.7               |
| FGA vs no FGA                                              | 5              | 1.70 | 1.44 to 2.00            | 45.8               |
| FGA vs SGA                                                 | 7              | 1.07 | 0.90 to 1.28            | 50.2               |
| Antipsychotic exposure vs no exposures                     | 2              | 2.02 | 1.08 to 3.77            | 63.2               |
| Individual antipsychotic                                   | 11*            | 1.88 | 1.57 to 2.25            | 81.2               |
| <i>Excluding self-control case series</i>                  |                |      |                         |                    |
| SGA vs no SGA excluding SCCS                               | 5              | 2.11 | 1.54 to 2.88            | 46.5               |
| <i>DerSimonian &amp; Laird CIs in studies of mortality</i> |                |      |                         |                    |
| Antipsychotic exposure vs no exposure                      | 4 <sup>s</sup> | 1.50 | 1.05 to 2.14            | 51.0               |

\*Number of Individual antipsychotic from 3 studies; <sup>s</sup> Number of comparisons from 2 studies

### B: Sensitivity analysis removing each study in turn in SGA vs no SGA analysis

| Study omitted        | Estimate | 95% Confidence interval |      |
|----------------------|----------|-------------------------|------|
| Kuo et al (2013)     | 2.10     | 1.69                    | 2.63 |
| Yang et al (2013)    | 1.92     | 1.60                    | 2.31 |
| Gau et al (2010)     | 1.92     | 1.63                    | 2.28 |
| Trifiro et al (2010) | 1.88     | 1.61                    | 2.20 |
| Knol et al (2008)    | 1.79     | 1.61                    | 1.98 |
| Pratt et al (2011)   | 2.11     | 1.69                    | 2.62 |
| <b>Combined</b>      | 1.93     | 1.65                    | 2.26 |

### C: Sensitivity analysis removing each study in turn in FGA vs no FGA analysis

| Study omitted        | Estimate | 95% Confidence interval |      |
|----------------------|----------|-------------------------|------|
| Kuo et al (2013)     | 1.75     | 1.45                    | 2.09 |
| Yang et al (2013)    | 1.57     | 1.39                    | 1.78 |
| Trifiro et al (2010) | 1.68     | 1.38                    | 2.06 |
| Knol et al (2008)    | 1.76     | 1.43                    | 2.16 |
| Pratt et al (2011)   | 1.72     | 1.36                    | 2.19 |
| <b>Combined</b>      | 1.69     | 1.44                    | 2.00 |

**D: Sensitivity analysis removing each study in turn in FGA vs SGA analysis**

| <b>Study omitted</b>     | <b>Estimate</b> | <b>95% Confidence interval</b> |      |
|--------------------------|-----------------|--------------------------------|------|
| Aparasu et al (2013)     | 1.04            | 0.85                           | 1.28 |
| Huybrechts et al (2012)  | 1.05            | 0.86                           | 1.27 |
| Wang et al (2007)        | 1.14            | 0.96                           | 1.36 |
| Trifiro et al (2010)     | 1.11            | 0.93                           | 1.32 |
| Huybrechts et al (2011)  | 1.08            | 0.88                           | 1.32 |
| Dharmarajan et al (2011) | 1.08            | 0.86                           | 1.37 |
| Jackson et al (2015)     | 1.02            | 0.87                           | 1.20 |
| <b>Combined</b>          | 1.07            | 0.90                           | 1.28 |

## Supplementary table 6: Database searches

Database: Embase <1974 to 2016 Week 18>

Search Strategy:

- 
- 1 \*pneumonia/ (43195)
  - 2 \*neuroleptic agent/ (28232)
  - 3 1 and 2 (28)
  - 4 exp pneumonia/ (229474)
  - 5 2 and 4 (105)
  - 6 from 5 keep 1,3-6,8,11-13,16,19-20,22,24-25,27-29,33,38,40-41,43,45,47,50,54,57-58,61,67,69 (32)

\*\*\*\*\*

Database: Epub Ahead of Print, In-Process & Other Non-Indexed Citations, Ovid MEDLINE(R)

Daily and Ovid MEDLINE(R) <1946 to Present>

Search Strategy:

- 
- 1 \*Antipsychotic Agents/ (33074)
  - 2 exp Pneumonia/ (80126)
  - 3 1 and 2 (41)
  - 4 from 3 keep 2-5,7-12,15,18-20,24-26,29 (18)

\*\*\*\*\*

Pubmed

Recent queries

| Search | Add to builder | Query                                                                       | Items found | Time     |
|--------|----------------|-----------------------------------------------------------------------------|-------------|----------|
| #13    | Add            | Select 19 document(s)                                                       | 19          | 06:53:24 |
| #12    | Add            | Search (#8 or #7)                                                           | 199         | 06:52:25 |
| #8     | Add            | Search antipsychotic and pneumonia                                          | 199         | 06:39:19 |
| #10    | Add            | Search antipsychotic and pneumonia Schema: all Filters: Observational Study | 0           | 06:39:00 |
| #9     | Add            | Search antipsychotic and pneumonia Filters: Observational Study             | 0           | 06:39:00 |
| #7     | Add            | Search (#6 or #5)                                                           | 18          | 06:36:24 |



|    |     |                                                                         |
|----|-----|-------------------------------------------------------------------------|
| #6 | Add | Search ("Pneumonia, Bacterial"[Mesh]) AND "Antipsychotic Agents"[Mesh]  |
|    | 5   | 06:35:26                                                                |
| #5 | Add | Search ("Antipsychotic Agents"[Mesh]) AND "Pneumonia, Aspiration"[Mesh] |
|    | 13  | 06:33:52                                                                |
